# Supplementary material
Source: PubMed Central journal article supplement (PMC11389184)
Supplement: PBI-14-1302-s001.pdf [file PBI-14-1302-s001.pdf]

(a)

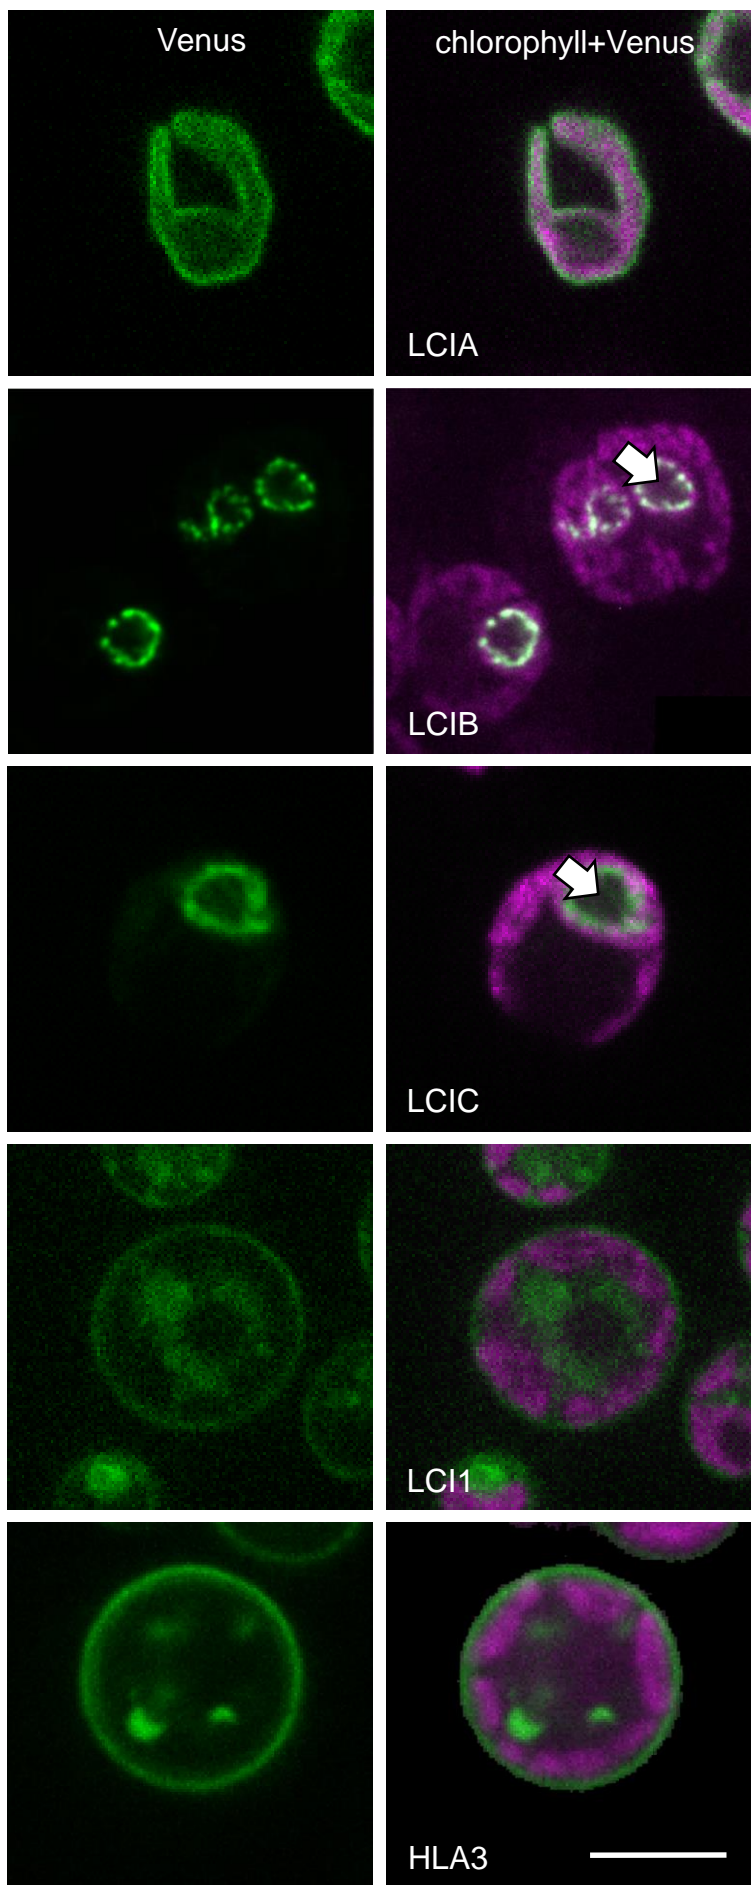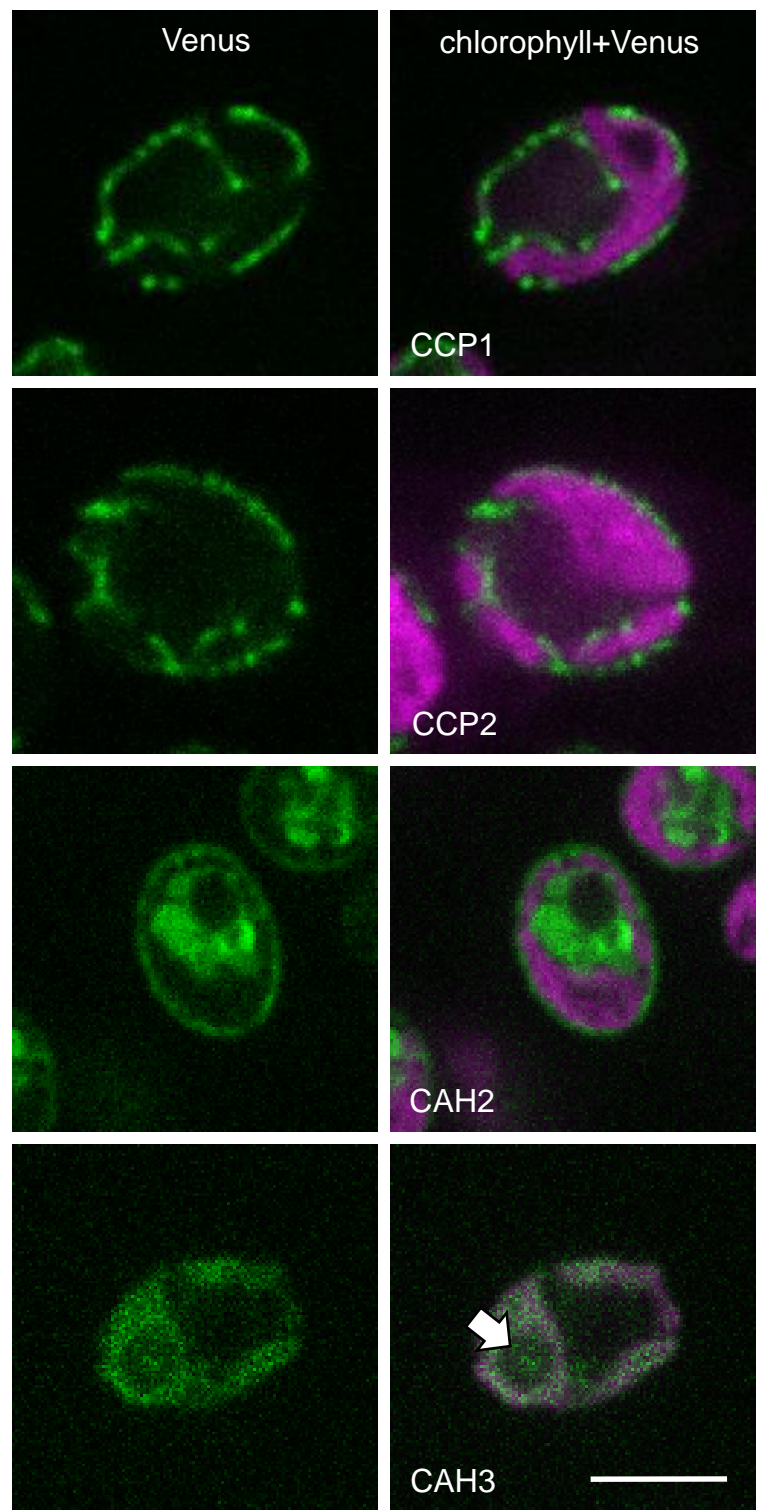

(b)

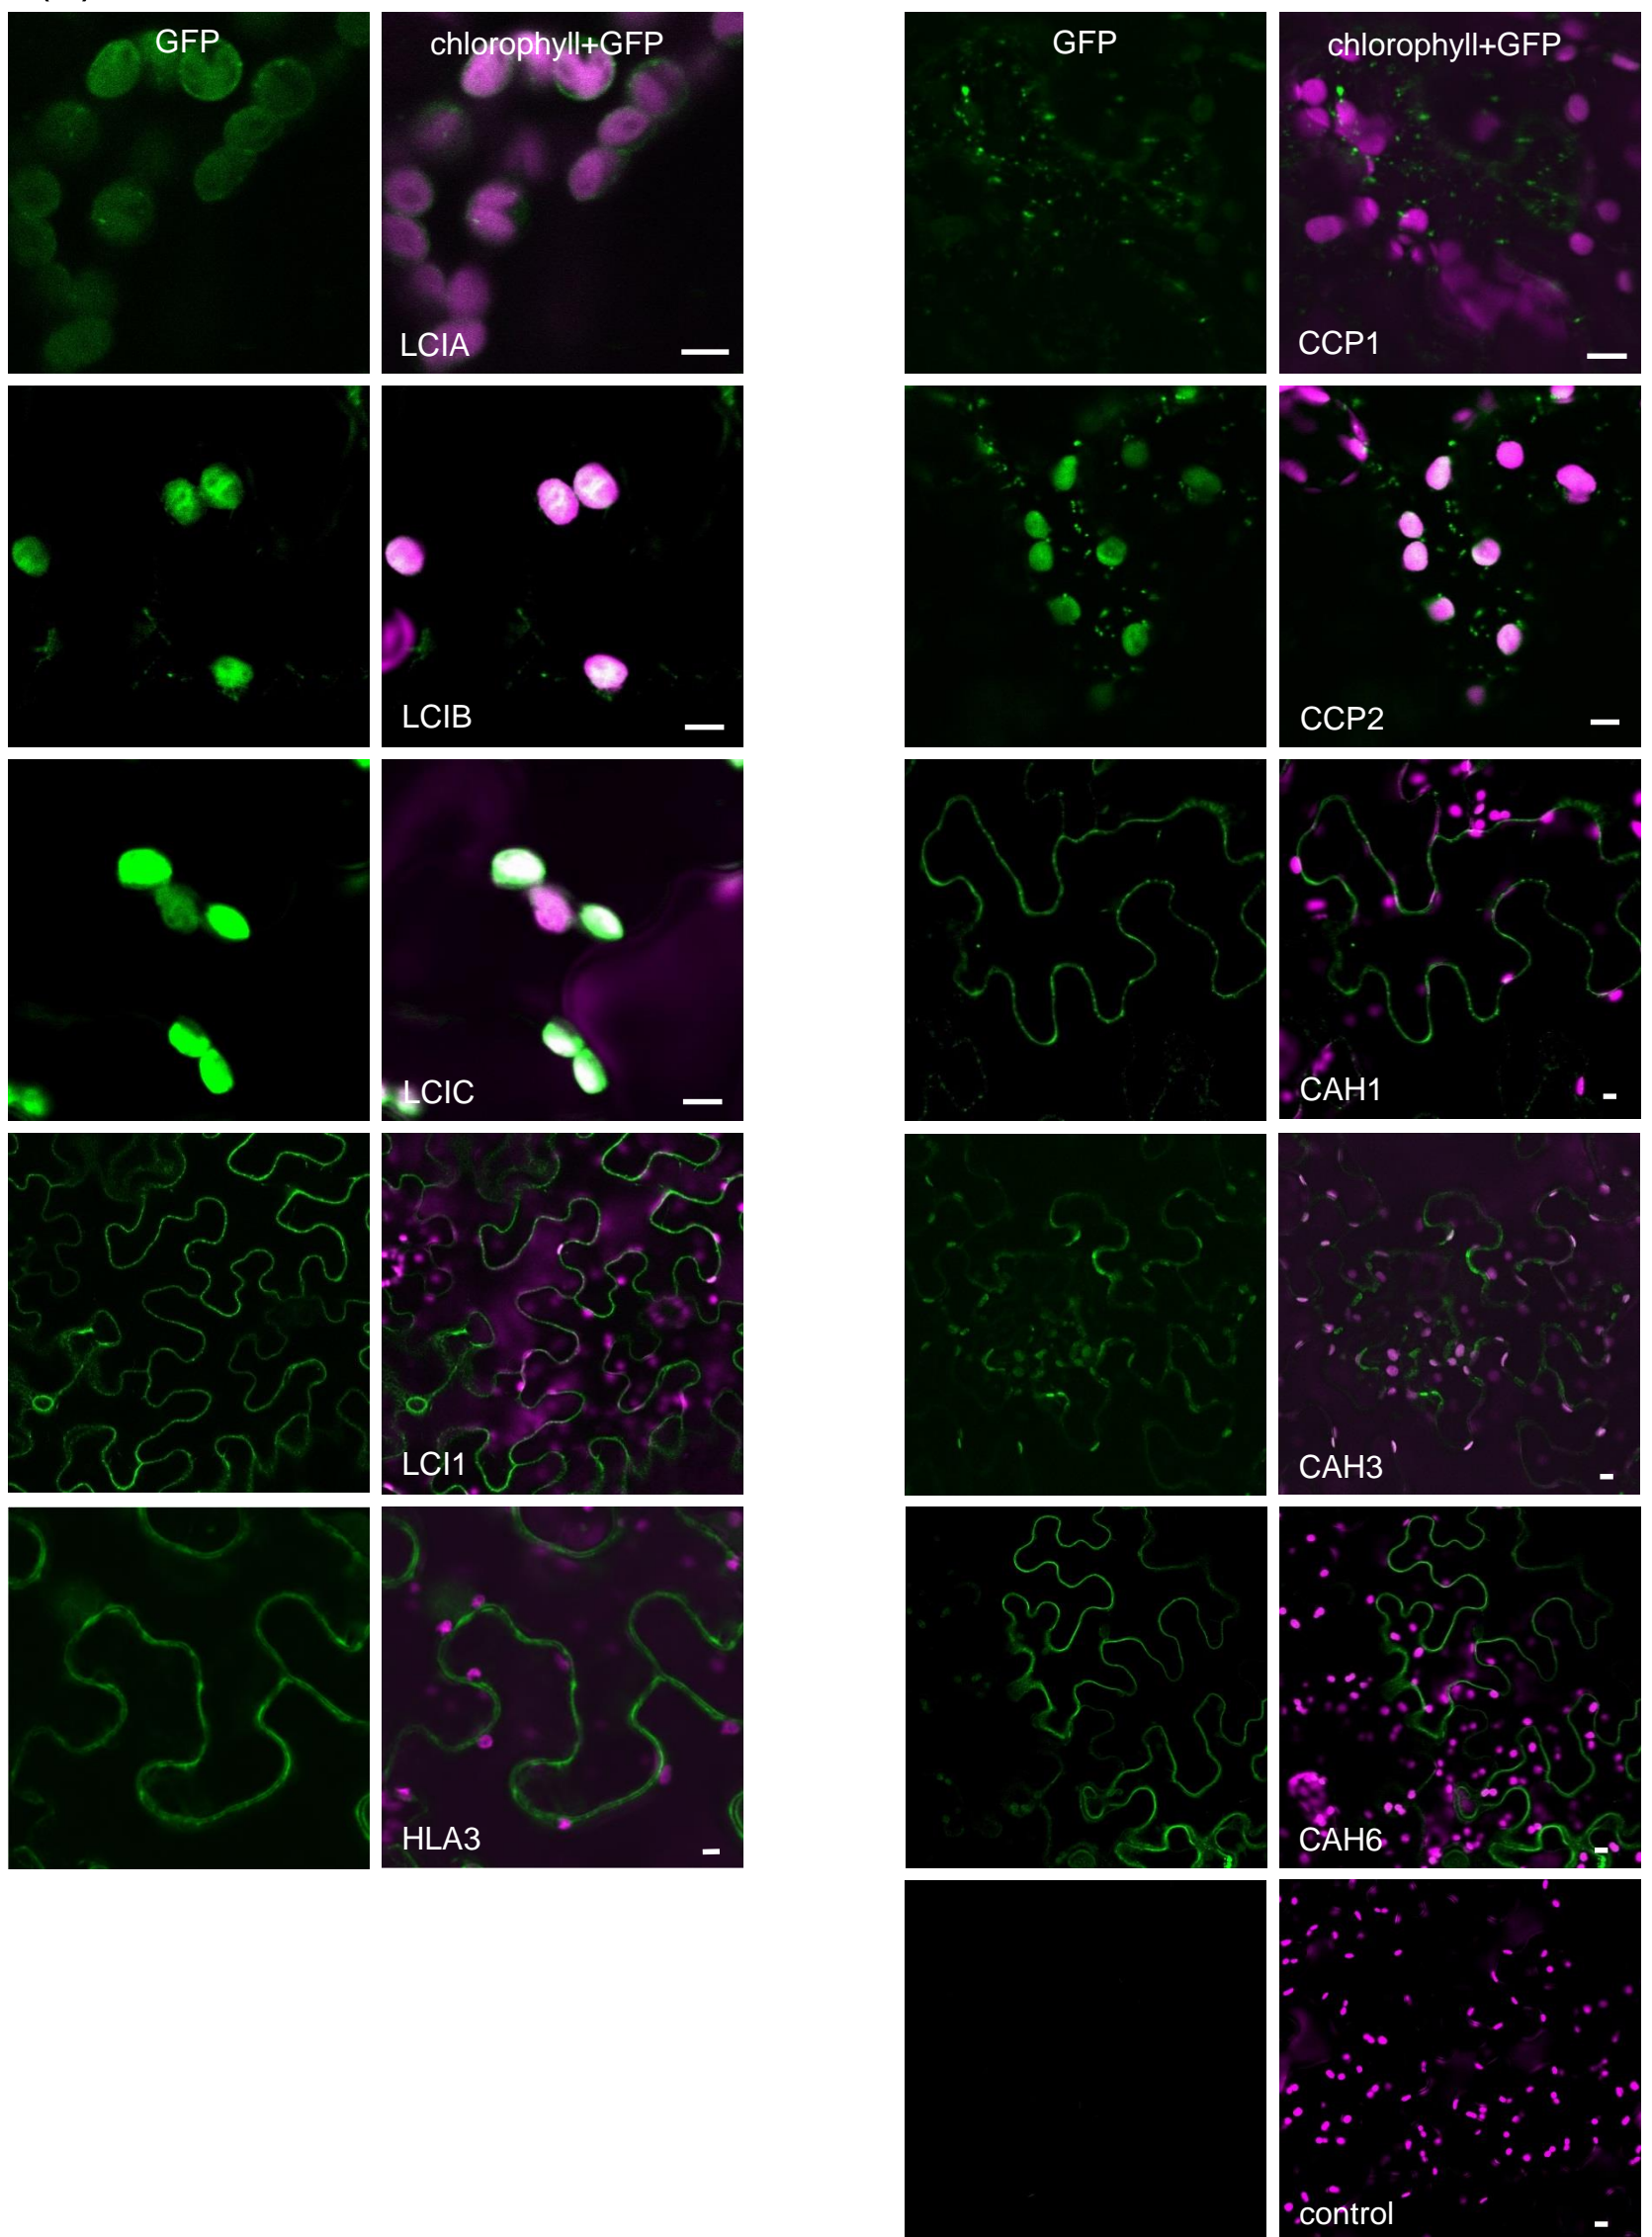

**Figure S1.** Expression of fluorescent-tagged CCM components in *Chlamydomonas* and tobacco (from Fig. 1). Expression of Venus-fused CCM-components in *Chlamydomonas reinhardtii* (a). Expression in tobacco of GFP-fused CCM components from *Chlamydomonas* (b). Green and purple signals are Venus or GFP fluorescence and chlorophyll autofluorescence, respectively. Overlaid images of these signals are shown: overlaps are white. Arrowhead shows the label-free area is the algal pyrenoid, a micro-compartment composed primarily of RuBisCO. A non-transformed control is included. Scale bar = 5  $\mu\text{m}$  (all 5  $\mu\text{m}$  for *Chlamydomonas* images).

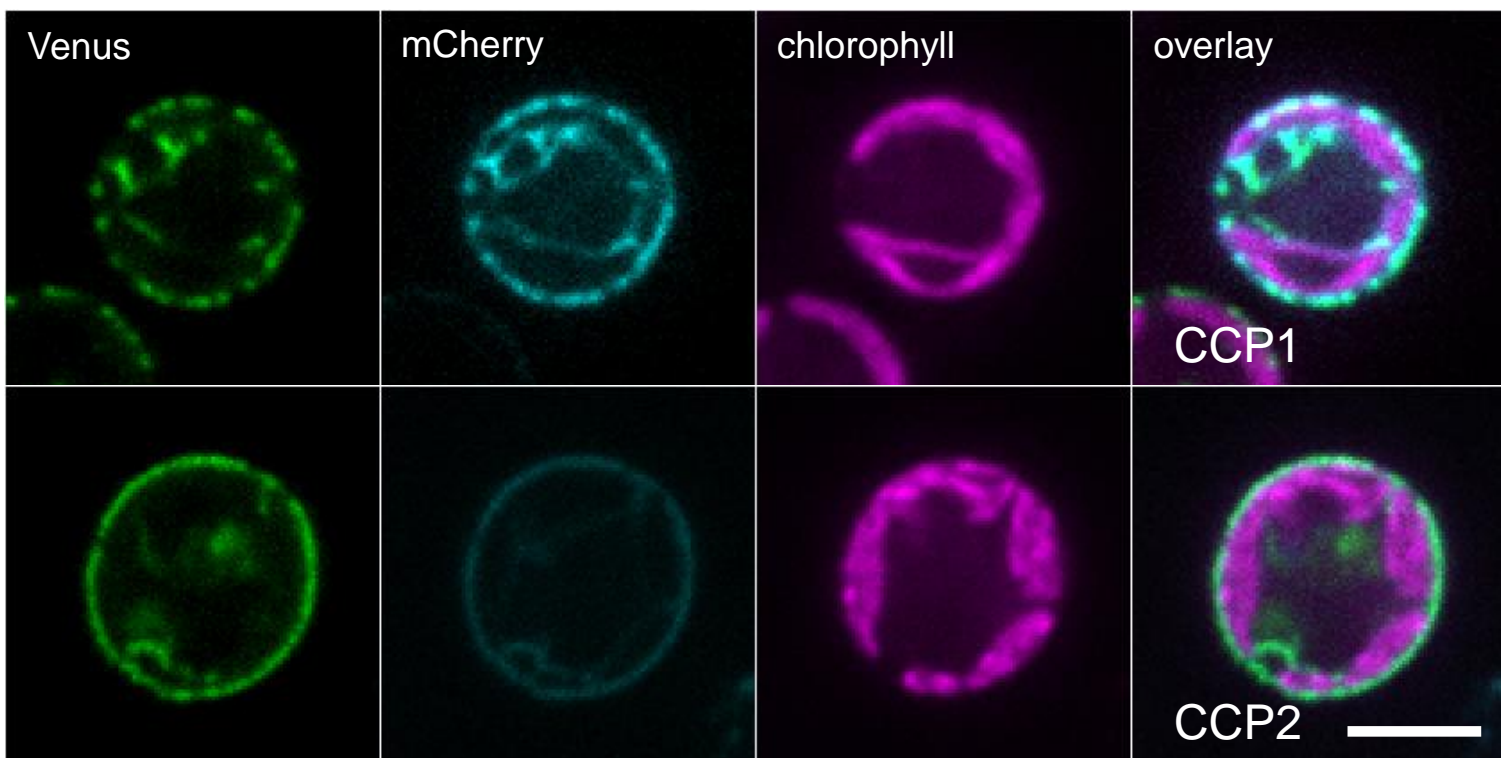

**Figure S2.** Co-expression of Venus-fused CCM components with Mitotracker® Red CMXRos in Chlamydomonas. Purple, green and cyan signals are chlorophyll autofluorescence, Venus and Mitotracker fluorescence, respectively. Overlaid images of these signals are shown: overlaps of Venus and Mitotracker are pale green. Scale bar = 5  $\mu$ m.



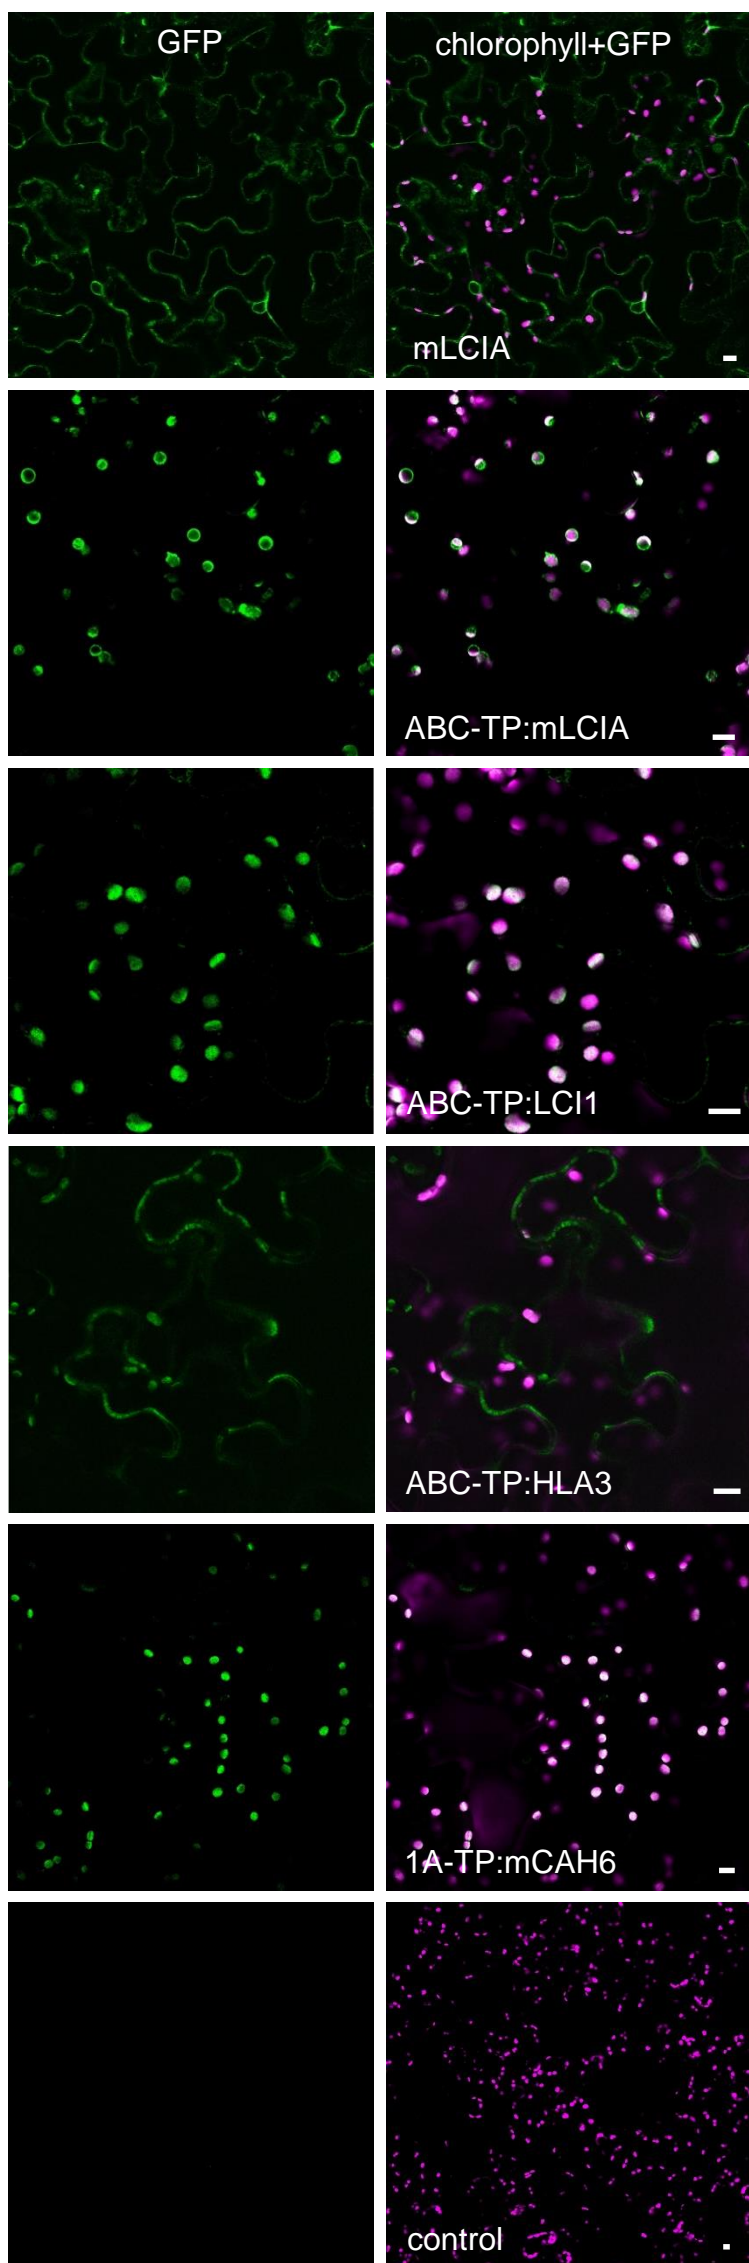

**Figure S3.** Expression of GFP-fused CCM components carrying native Arabidopsis chloroplast transit peptides in tobacco (from Fig. 3). Green and purple signals are GFP fluorescence and chlorophyll autofluorescence, respectively. Overlaid images of these signals are shown: overlaps are white. A non-transformed control is included. Scale bar = 10  $\mu$ m.

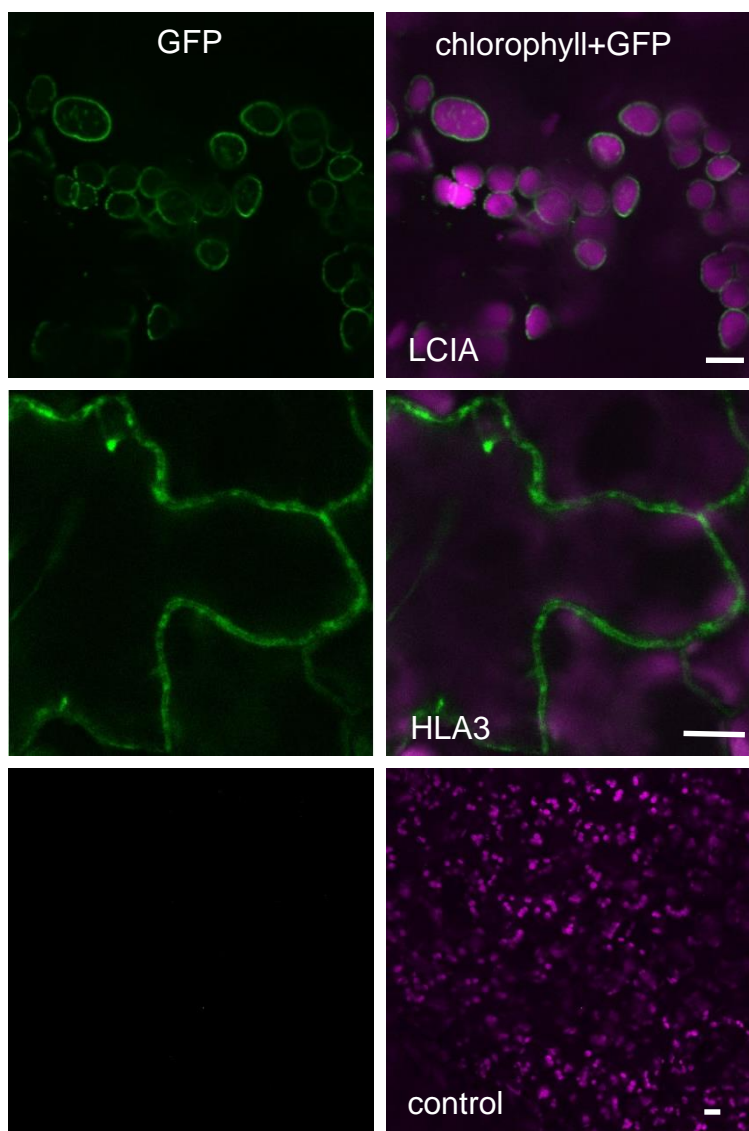

**Figure S4.** Stable expression of LCIA:GFP and HLA3:GFP in Arabidopsis (from Fig. 5a). Green and purple signals are GFP fluorescence and chlorophyll autofluorescence, respectively. Overlaid images of these signals are shown: overlaps are white. A non-transformed control is included. Scale bar = 10  $\mu$ m.

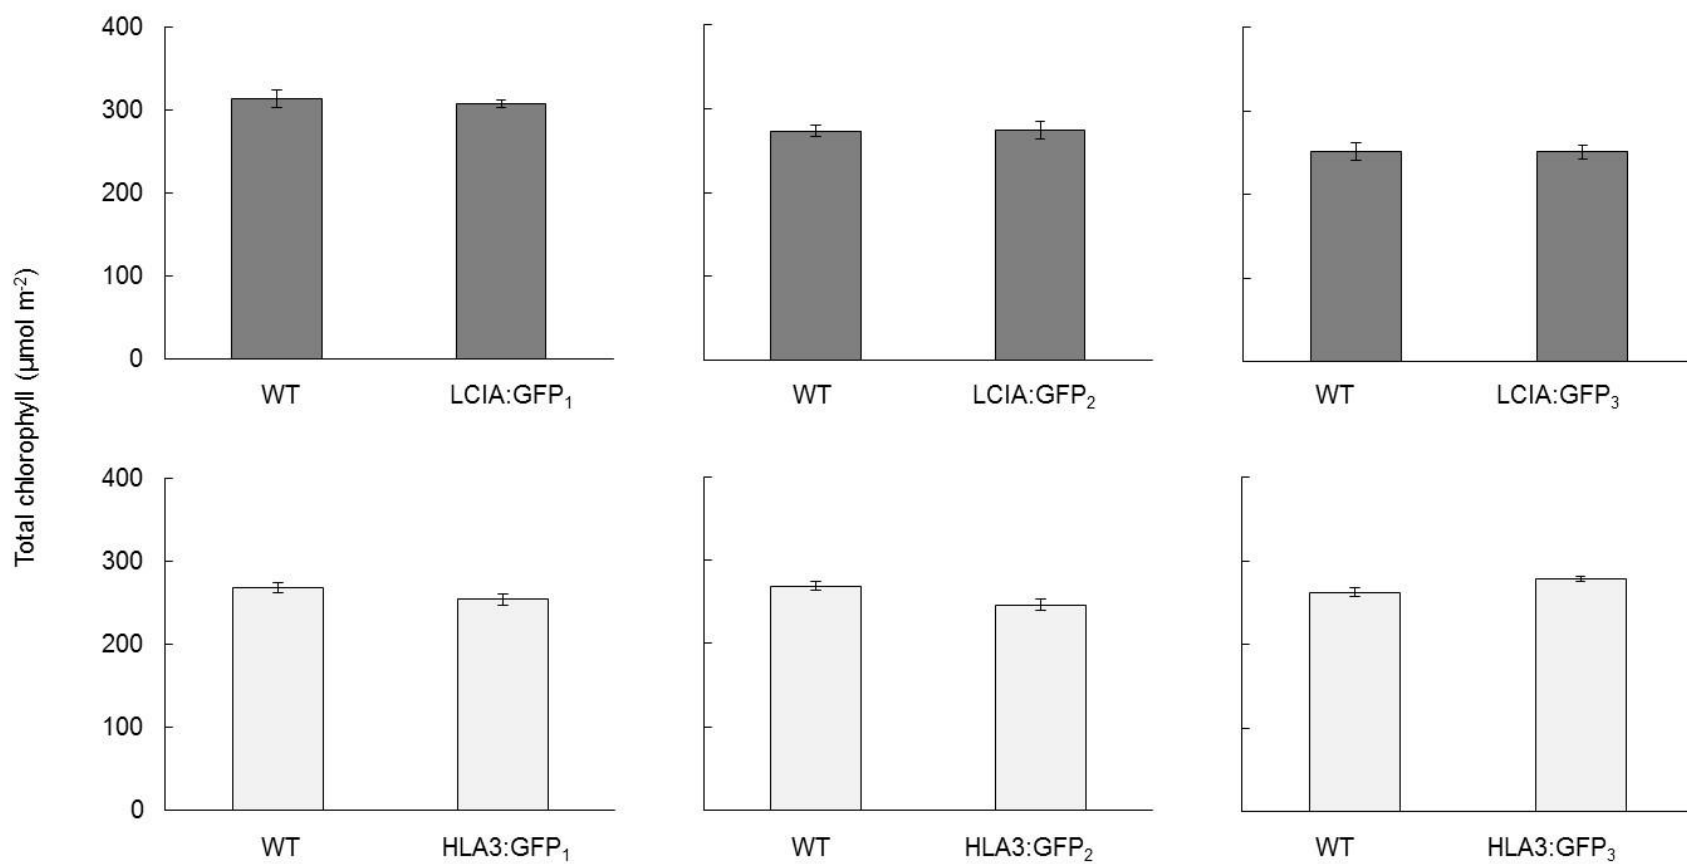

**Figure S5.** Chlorophyll content of transgenic *Arabidopsis* plants expressing LCIA or HLA3. Chlorophyll content measurements are shown for 8 separate plants, bars are means  $\pm$  SE. ANOVA revealed that there were no statistically significant differences between samples ( $P < 0.05$ ).

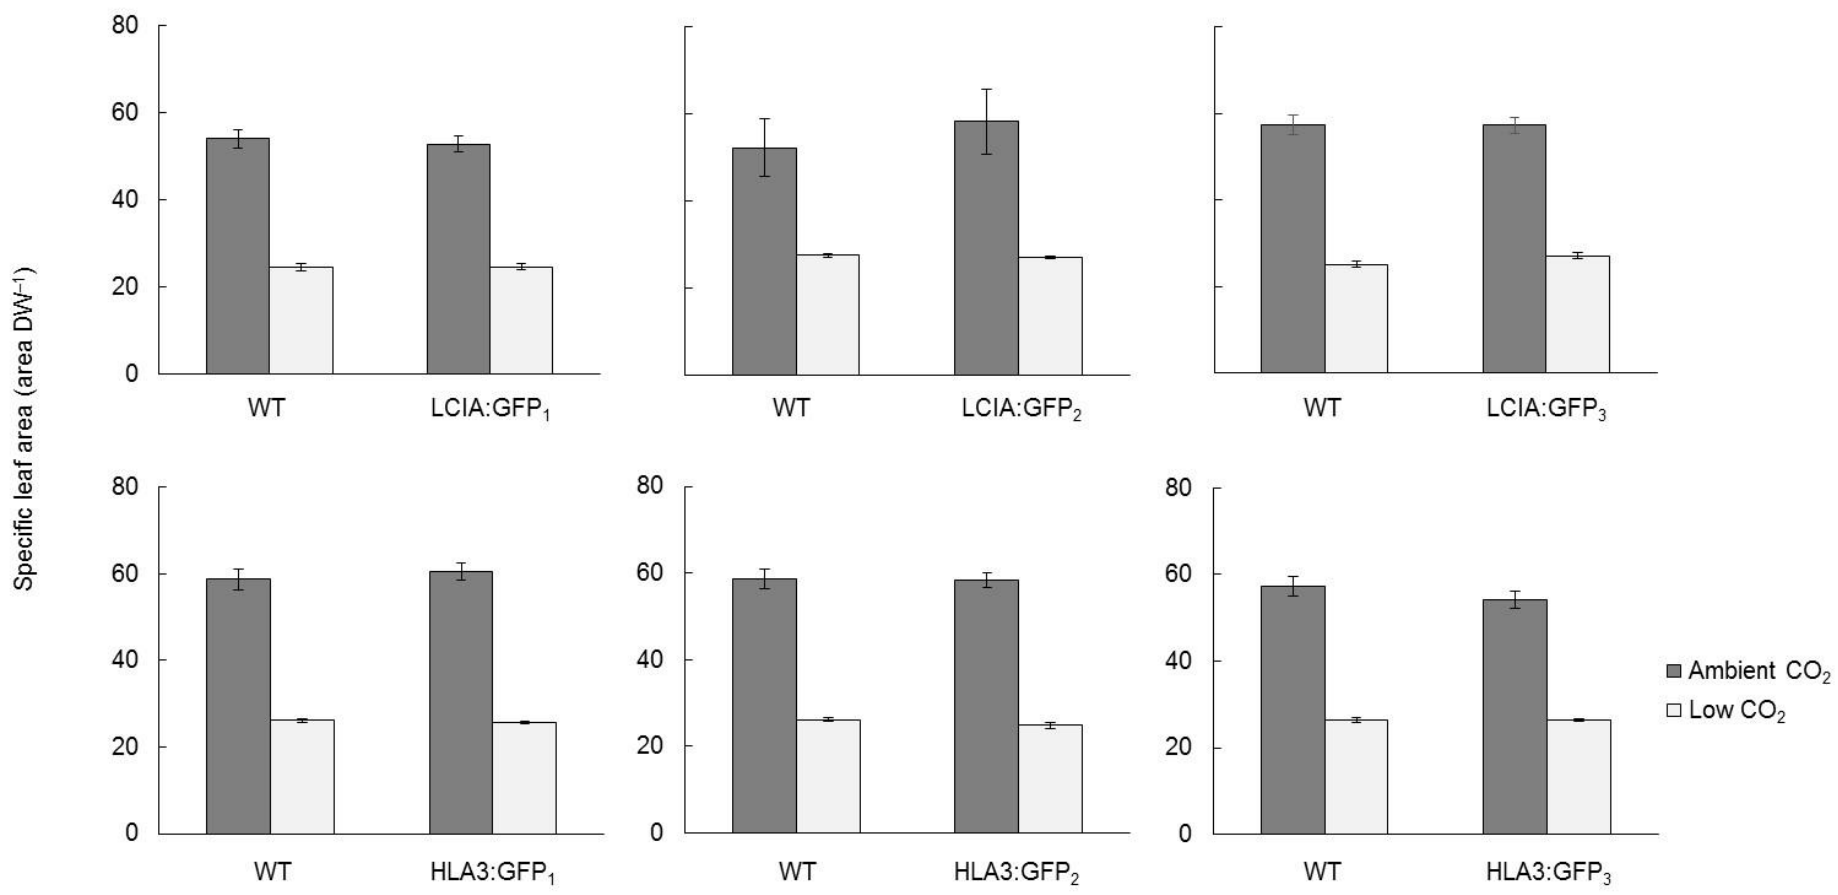

**Figure S6.** Specific leaf area (area/DW) of transgenic LCIA or HLA3 Arabidopsis plants. Values are the means  $\pm$  SE of measurements made on 24 rosettes. Growth conditions refer to those outlined in Fig. 6.

**Codon optimised LCIA (1011 bp)**

ATGCAGACAACTATGACAAGACCTTGTAGCCAGCCAGTGTACGATCCAGAGTTCTTAGATCGCCAATGC  
GGGTTGTGCTGCTAGTGCTCCGACAGCTGTGACAACTGTCGTACCTCAAATGGAAATGGGAACGGGCACTT  
TCAGGCGGCTACGACTCCTGTGCCACCAACGCCAGCTCCTGTAGCTGTGTCTGCGCCTGTCAGGGCTGTTAGT  
GTTCTGACACCCCTCAAGTTTATGAAAACGCAATTAACGTTGGAGCCTATAAAGCTGGACTTACTCCGCTGGC  
AACATTCGTACAAGGTATTCAAGCCGGTGCATACATCGCATTGGCGCTTTCTTAGCTATAAGCGTCGGCGGC  
AATATCCCGGAGTTGCTGCTGCAAACCTGGACTAGCAAAGTTGCTATTTGCTCTCGTGTTCCTGTGCGACT  
TTCGATGGTGACTAATTGTTGGTGCAGAACTTTCCACGGTAACACCATGATGTTGACATGCGCCTTAATCGAG  
AAAAAGGCCACTTGGGGCAACTCCTTAAGAACTGGTCTGTGTCTTACTTTGGTAACTCGTTGGTAGTATCG  
CTATGGTAGCGGCAGTTGTTGCCACCGTTGCCTCACCACGAATACTCTACCAGTTCAAATGGCGACACTTAA  
GGCGAATTTGGGATCACTGAGGTTTTAAGTCGTTCAATCCTCTGTAATTGTTGGTATGTTGTGCAGTTTGGT  
CAGCCTCCGACGACGAGCCTTCCGGGAAGGATTCTGCTCTTTGGCCCTGCATCACTGCCTTCGTGGCAAT  
AGGATTGGAACATTCCGTGGCTAATATGTTTGAATTCCACTCGGGATGATGCTAGGAGCGGAGGTGACTTG  
GAGCCAGTTTTCTTAAACAACCTGATTCCCGTTACGCTGGGCAATACCATAGCTGGTGTCTTGATGATGGCAA  
TAGCATATTCTATTTCAATTCGGTTCTTTGGGTAAATCTGCTAAACCTGCTACAGCATGA

**Codon optimised HLA3 (3978 bp)**

ATGGGAGAGGGGAAGGTGGCCGAGAGAGGTCATGATCCTACTGCAGGCTTCTTCAACAAGTTTGCTTTCCGG  
TGGATGTACAAATGGATTGGTGTGCTAGGCGAGGTGAAGAACTTAATGCCGAAGAAATGGGTATGCCACCA  
GAAAACATGGCACACGAGGCTTATGATAAGTTTGC GGCCATTGGGCTGCGGAGCAGAACTTAAAGACCA  
GATGGGCAGAAGCCGTCATTGGTAAGGGCTCTTAGAAAATCATTGGTCTATTCTACATGTTGGGAGGTCTTT  
GCAAATGCGGATGGTCAACATTGCTGATTCTGGTGTCTTTACTTTGTGCGTTCACTCTTGTGCGATGTCAACT  
ATGTAGATGCTCCTACGAAAAAGTGGACAACGGCTGAACTTTGTATGGCCAAACAACCGCTGGATGGCTCTT  
AATGATGGGTTTACAATAGATGCTTGGCTTTTGGGACTTTGTCTCAAAGAATGGGTTACATATGCATGACG  
GTTGGTATCCGTGCGAGAGCTGCTCTTGTCCAAGCGTTACTCATAAAGCTTTCCGACTTAATACGGTTAGAG  
CTGATCAATCAGCCGCGATTGTCAACTTCGTGGCTTCCGATATCCAGAAAATCTACGATGGGGCGTTAGAGTT  
TCATTATCTTTGGACCGCCCTTTTGAAGCCGAGCAATCCTTGCCCTCTTGGGATACTTGACACAAGACTCCAT  
GCTCCCAGGATTGGGGGTCAATTTGCTAGTGTTCCTATGCAGTATTACTTCGGTTATAAGATTGTACAAATCA  
AGCTTCAAACGCTAAGCATGTTGCTCTCCGGTCAGCAATTATGCAGGAAGTGCTTCTGCTATCAAGCTTGTT  
AAGTACTACGCATGGGAACAGTCTTTCGAGAACCAAATCTCAAAGTACGTAGGGAGGAAATAAGGTTGAAC  
TTCTGGAATTGCGTCATGAAGTCAATTAACGTTGCATGTGTATTTGTGTTCCGCCTATGACAGCCTTTGTGAT  
CTTACCCTTATGAGTTTCAACGCGCTAGATTAGTATCTTCTGTGGCGTTTACTACACTCAGCTTATTCAATAT  
CCTGCGCTTTCCGTTGGTTGTTTTGCCAAAGGCTCTGAGAGCTGTTTCTGAAGCTAACGCTAGCTTGCAAAGAT  
TGGAAGCGTATTTGTTGGAAGAGGTTCCATCTGGAACAGCAGCAGTAAAGACTCCTAAGAATGCGCCACCGG  
GAGCGGTCATTGAAAACGGGGTGTTCATCATCCCTCTAACCCAAATTGGCATCTCCACGTACCAAAGTTTGA  
GGTAAAGCCAGGTCAGGTGGTCGCTGTTGTTGGTCGGATTGCCGCTGGTAAGAGCTCGTTGGTACAAGCTAT  
ATTGGGTAATATGGTTAAGGAACACGGTTCCTTCAATGTTGGTGGCCGGATCAGCTACGTACCTCAGAATCCT  
TGGCTCCAAAACCTTTCTTTCGAGACAACGTGCTTTTGGTGAACAATTTGACGAGAATAAGTACACGGATG  
TCATTGAATCTTGTGATTGACTCTGGACCTTCAAGATACTTTCCAACGGGGATCAGAGTAAAGCTGGTATTAGA  
GGAGTGAATTTCTCCGTGGGCAAAGACAAAGGGTCAACCTTGTCTGTTGTGCCTACGCAGACGCCGACCTT  
GTCCTGTTGGACAACGCGCTGTCCGCGGTGGATCATCATACGGCGCATCACATTTTTGATAAATGTATCAAAG  
GATTATTCAGTGATAAAGCCGTAGTGTCTGTTACTCACCAGATTGAGTTCATGCCTAGGTGTGATAACGTTGCT  
ATCATGGATGAGGGCCGATGTCTCTACTTCGTAAGTGAACGAAGAGGCTCAACATCTTCTGGGAAAATTG  
CTCCCTATCACACATCTCCTTACGCCGAGGCTCGCAGGAAGCTCCTCCAGCACCGAAGAAAAAGGCAGAAG  
ATAAGGCAGGGCCACAAAAGTCACAGAGTTTACAGTTAACACTTGCCTAACCTCTATAGGAAAGCCCACCGA  
AAAACCAAAGATGTTCAAAGCTTACGGCCTACCAGGCTGCACTTATCTATACCTGGTATGGAAATTTGTTCT



TGGTGGGAGTTTGTTCCTTCTTCTTCTGCTGCTCAATGTTCCCGCCAGATCTCAGACTTTTGGGTGAGGTGG  
TGGGTTAATGATGAATACAAGAAGTTTCTGTCAAGGGAGAACAAGACTCGGCTGCAACTACCTTTACTGCT  
TGATATATCTTCTACTAGTTGGTCTGTTTTACATTTTCATGATCTTTAGGGGTGCGACCTTTCTCTGGTGGGTAT  
TGAAAAGCTCCGAAACAATTCGTGTAAGGCACTGCATAACGTCCTAAATGCTCCAATGGGGTTCTTCTTGTG  
ACACCAGTTGGAGATCTGTTGCTTAACCTTACAAAAGATCAAGACATAATGGATGAAAATCTTCCGGACGCCG  
TGCACTTTATGGGAATCTATGGCTTGATATTGTTAGCCACCCTATAACTGTAAGTGTGACTATTAACCTTCTCG  
CTGCTTTTACAGGTGCGTTGATAATCATGACGCTCATCATGTTATCAATCTATCTGCCAGCTGCTACAGCACTTA  
AGAAAGCAAGAGCAGTGTGAGGTGGGATGCTAGTGGGACTTGTGCTGAAGTCTTGGAGGGGCTCGGTGTG  
GTGCAAGCATTCAATAAGCAAGAGTATTTCAATTGAAGAGGCTGCTAGACGTACAAAACATCACTAATAGTGCTG  
TTTTCAACGCAGAGGCTTTGAACCTCTGGTTAGCATTTTGGTGTGACTTCATTGGTGTGCTTGGTGGGCGTC  
GTTTCTGCGTTTGCAGTTGGGATGGCAAAGGATTTAGGTGGCGCTACTGTTGGTCTGGCATTCTAATATCAT  
TCAAATGCTCGTGTCTATACTTGGGTGGTTAGATTCAATTCAGAGTCTATCTCGCTATTCAATAGCGTTGAGG  
GAATGGCTTATTTGGCAGATTATGTGCCACACGATGGAGTGTGTTTATGACCAGCGTCAAAAAGATGGAGTCGC  
TAAGCAAATAGTTTACCGGATGGTAATATCGTCCCAGCGGCTCCAAGGTTCAAGTTGTTGTGGATGACGCA  
GCGTTGGCTCGATGGCCTGCTACAGGAAAATATCAGATTTGAAGATGTGTGGATGCAATATCGTTTAGATGCC  
CTTGGGCGCTTAAAGGCGTAACTTTCAAATCAATGACGGTGAGAAGGTGGGTGCAAGTGGGAAGAACAGGA  
TCTGGTAAAAGTACAACGCTTTTAGCTCTGTACAGGATGTTGAACTCGGAAAAGGGAGAATCTTAGTCGACG  
GCGTGGATATAGCTACATTGTCTTTGAAGAGACTCCGTACCGGGCTCAGTATTATCCCCAAGAGCCAGTTAT  
GTTACAGGAACTGTTCCGGTCTAATCTGGATCCCTTGGAGAGTTCAAGGATGACGCCATACTTTGGGAAGTG  
CTCAAGAAAGTTGGATTAGAGGACCAGGCTCAGCACGCCGGTGGATTGGACGGACAAGTCGACGGAAGTGG  
TGGCAAAGCTTGGTCGCTCGGACAAATGCAATTGGTATGCCTTGCTAGAGCAGCACTCAGAGCCGTGCCATT  
TTGTGTCTTGATGAGGCCACTGCAGCGATGGATCCTCATACTGAAGCAATTGTTCAACAGACGATAAAGAAAG  
TATTCGATGACCGGACCACTATCACTATCGCACATCGTTAGATACGATCATAGAAAGCGACAAGATTATCGT  
TATGGAGCAAGGCTCTTATGGAATATGAATCGCCTAGTAAGCTGCTGGCTAACCGAGATTCGATGTTCTCC  
AAACTCGTTGATAAACTGGACCTGCAGCTGCGGCAGCTCTACGTAAGATGGCTGAAGATTTTTGGAGTACGC  
GTTACAGCGCAAGGCCGTAATCAATGA

**Figure S7.** DNA sequences of codon-optimised LCIA and HLA3.

**Table S1.** Sequences of synthetic oligonucleotides used in this study.

| Gene name               | Phytozome 10.2 Cr v5.5 (Augustus u11.6) | Gene length (bp) | Forward primer                                          | Reverse primer                                 | Internal forward primer  | Internal reverse primer  |
|-------------------------|-----------------------------------------|------------------|---------------------------------------------------------|------------------------------------------------|--------------------------|--------------------------|
| <b>Full-length ORFs</b> |                                         |                  |                                                         |                                                |                          |                          |
| LCIA                    | Cre06.g309000                           | 2001             | GCTACTCACAACAAGCCCAGTTATGCAGACCAC<br>TATGACTCGCCCTTG    | GAGCCACCCAGATCTCCGTTGCGGGTGGCG<br>GGCTTGG      |                          |                          |
| LCIB                    | Cre10.g452800                           | 2172             | GCTACTCACAACAAGCCCAGTTATGTTGCTCTG<br>TCTTCGC            | GAGCCACCCAGATCTCCGTTGTTCTTGGGG<br>GCCTCGAAG    |                          |                          |
| LCIC                    | Cre06.g307500                           | 2161             | GCTACTCACAACAAGCCCAGTTATGGCCCTTGC<br>TCAGAAGATGAACGTG   | GAGCCACCCAGATCTCCGTTGTTTATGTTGG<br>CGAGCTCGGGC |                          |                          |
| LCI1                    | Cre03.g162800                           | 1616             | GCTACTCACAACAAGCCCAGTTATGTCGGGCTT<br>GAACAAGTTCATC      | GAGCCACCCAGATCTCCGTTTACCTTGGTG<br>GCGCCGTC     |                          |                          |
| HLA3*                   | Cre02.g097800                           | 6068             | GCTACTCACAACAAGCCCAGTTATGGGCGAGGG<br>CAAGGTGGCC         | GAGCCACCCAGATCTCCGTTCTGTTGCGG<br>CCCTGCGCG     | ACTTCTCCGGTGGC<br>CAGCGC | CAGCACCAGGTCGG<br>CGTCGG |
| CCP1                    | Cre04.g223300                           | 1891             | GCTACTCACAACAAGCCCAGTTATGTCATCCGA<br>CGCTATGACTATCAACGA | GAGCCACCCAGATCTCCGTTCTGCGCGGCG<br>GTGGGCG      |                          |                          |
| CCP2                    | Cre04.g222750                           | 1801             | GCTACTCACAACAAGCCCAGTTATGGCATCCGA<br>CGCTATGACTATCAACG  | GAGCCACCCAGATCTCCGTTCTGAGCGGTG<br>GCGGGGCC     |                          |                          |
| CAH2                    | Cre04.g223050                           | 3309             | GCTACTCACAACAAGCCCAGTTATGGCGGTAC<br>TGGCGTCTAC          | GAGCCACCCAGATCTCCGTTCTCGTAGCGG<br>GCCAGCTTGATG |                          |                          |
| CAH3                    | Cre09.g415700                           | 1594             | GCTACTCACAACAAGCCCAGTTATGCGCTCAGC<br>CGTTCTAC           | GAGCCACCCAGATCTCCGTTCTAGCTCGTATT<br>CGACCAGG   |                          |                          |
| CAH6                    | Cre12.g485050                           | 1226             | GCTACTCACAACAAGCCCAGTTATGGGATGCGG<br>TGCCAGCGTG         | GAGCCACCCAGATCTCCGTTCTCGGCGCTG<br>CTGCCGCC     |                          |                          |
| <b>cDNA</b>             |                                         |                  |                                                         |                                                |                          |                          |
| LCIA                    | Cre06.g309000                           | 1008             | ATGCAGACCACTATGACTCGCC                                  | CGCGGTGGCGGGCTTGGC                             |                          |                          |
| LCIB                    | Cre10.g452800                           | 1344             | ATGTTGCTCTGCTTCGCG                                      | GTTCTTGGGGCCTCGAAG                             |                          |                          |
| LCIC                    | Cre06.g307500                           | 1329             | ATGGCCCTTGCTCAGAAGATG                                   | GTTTATGTTGGCGAGCTCG                            |                          |                          |
| LCI1                    | Cre03.g162800                           | 576              | ATGTCGGGCTTGAACAAGTTCATCTATGTGG                         | CACCTTGGTGGCGCCGTCAG                           |                          |                          |
| HLA3                    | Cre02.g097800                           | 3975             | ATGGGCGAGGGCAAGGTG                                      | CTGTTGCGGCCCTGCGC                              |                          |                          |
| CCP2                    | Cre04.g222750                           | 1065             | ATGGCATCCGACGCTATGACTATCAACGAGG                         | CTGAGCGGTGGCGGGCCGAT                           |                          |                          |
| CAH1                    | Cre04.g223100                           | 1131             | ATGGCGCTACTGGCGCTC                                      | GTGATAGCGGGCCAGCTTGATG                         |                          |                          |
| CAH3                    | Cre09.g415700                           | 930              | ATGCGCTCAGCCGTTCTAC                                     | CAGCTCGTATTCGACCAGG                            |                          |                          |
| CAH6                    | Cre12.g485050                           | 792              | ATGGGATGCGGTGCCAGCGTGC                                  | CTCGGCGGTGCTGCCCCCTT                           |                          |                          |
| LCIA                    | synthetic codon optimised (Fig. S7)     | 1008             | ATGCAGACAACCTATGACAAGACCT                               | TGCTGTAGCAGGTTTAGCAGAT                         |                          |                          |
| HLA3                    | synthetic codon optimised (Fig. S7)     | 3975             | ATGGGAGAGGGGAAGGTG                                      | TTGATTACGGCCTTGGC                              |                          |                          |
